# Supplementary material for: EBV-miR-BART7-3p promotes the EMT and metastasis of nasopharyngeal carcinoma cells by suppressing the tumor suppressor PTEN
Source: Springer Nature journal article supplement (doi:10.1038/onc.2014.341), 2014-10-27

**a**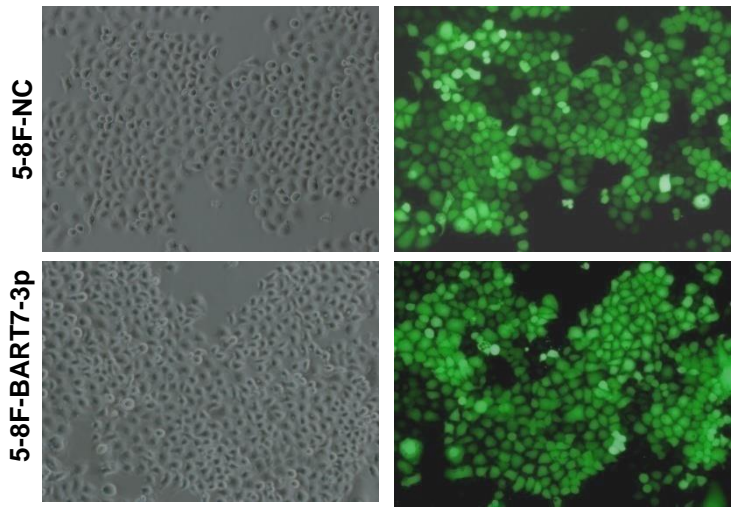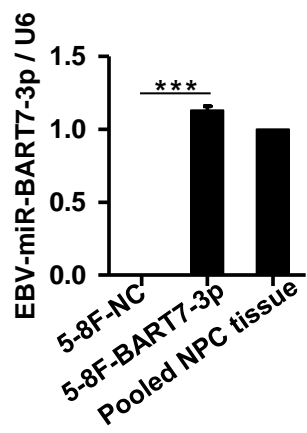**b**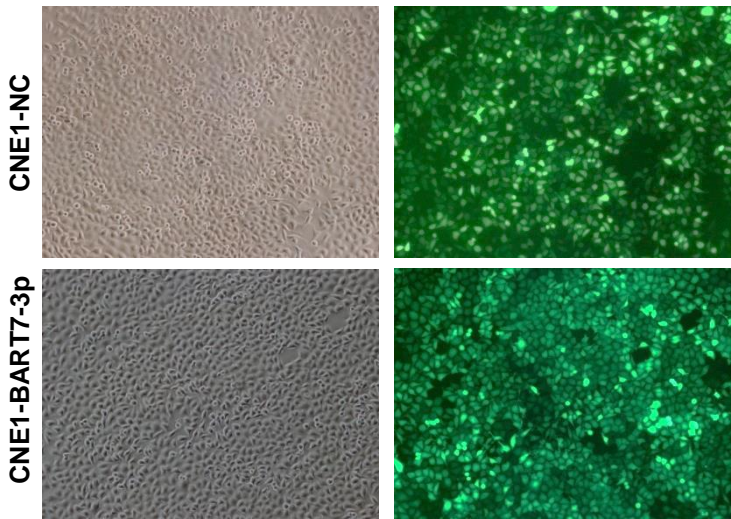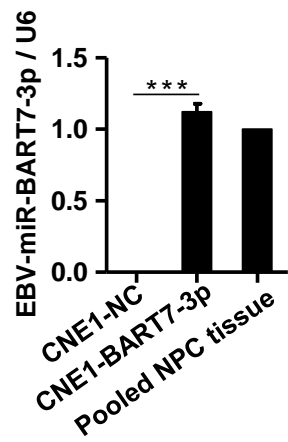

**a**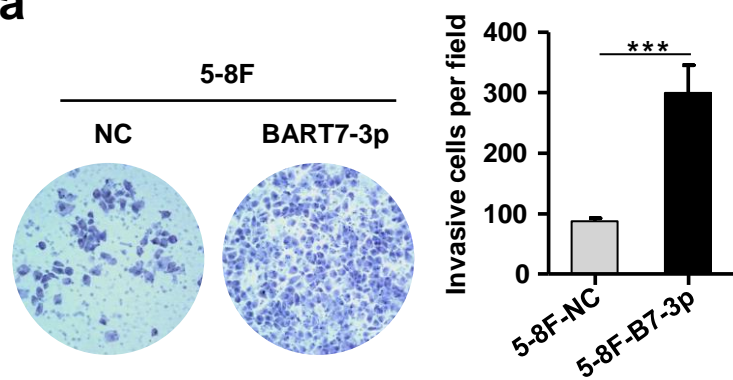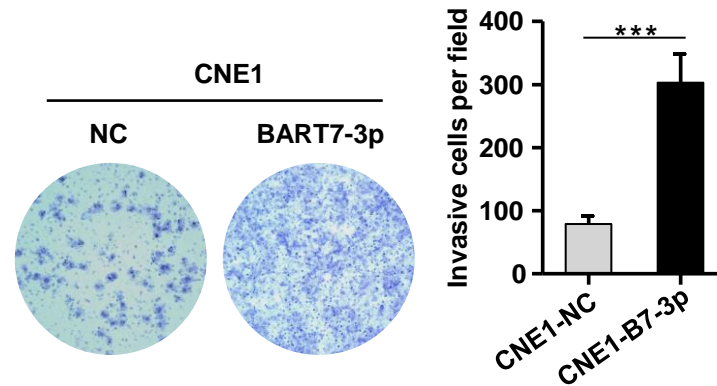**b**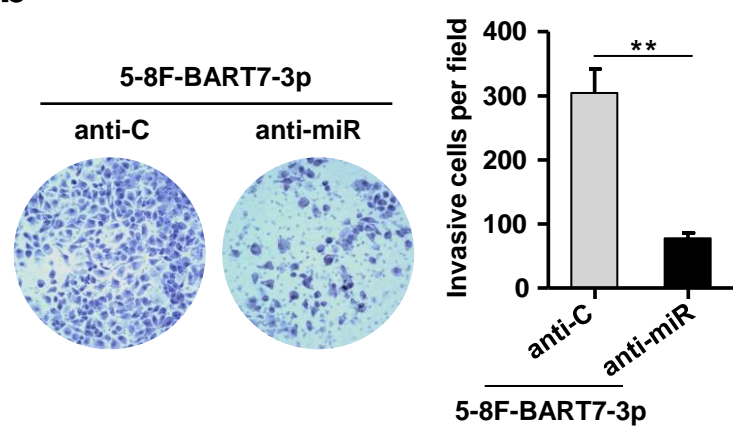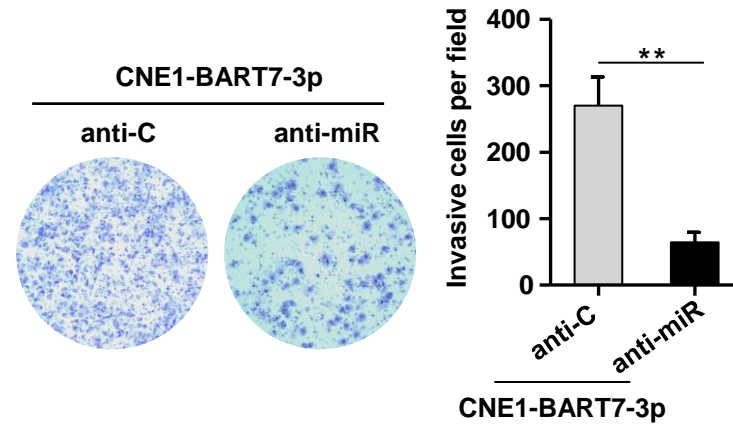

**a**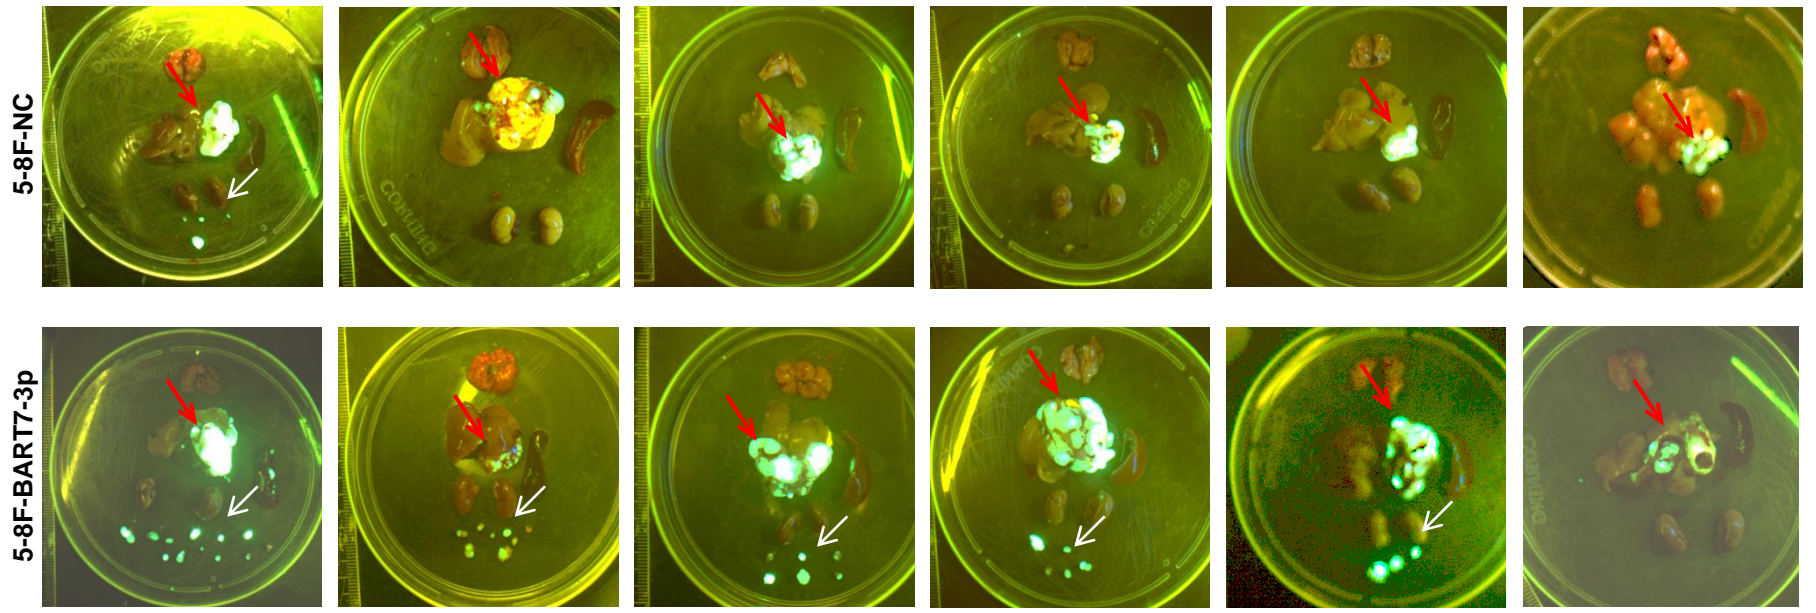**b**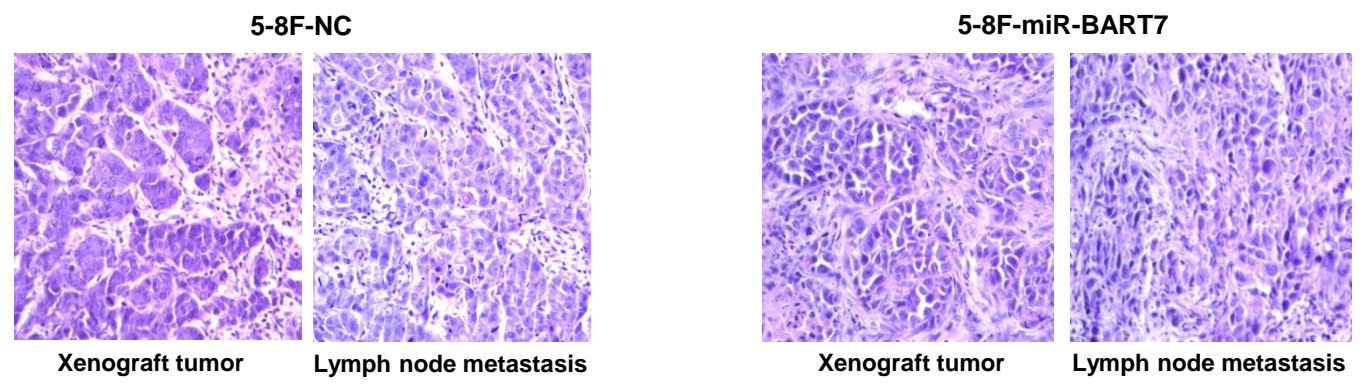

5-8F-NC

5-8F-miR-BART7

Xenograft tumor

Lymph node metastasis

Xenograft tumor

Lymph node metastasis

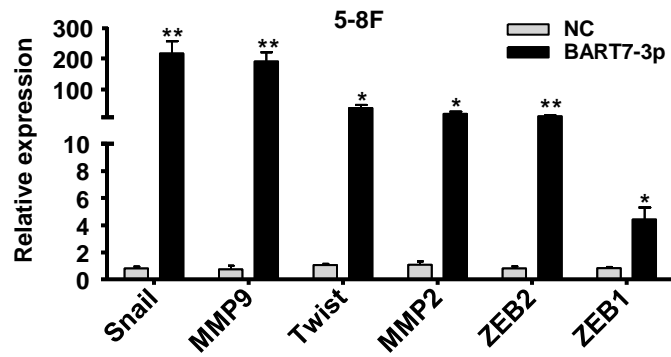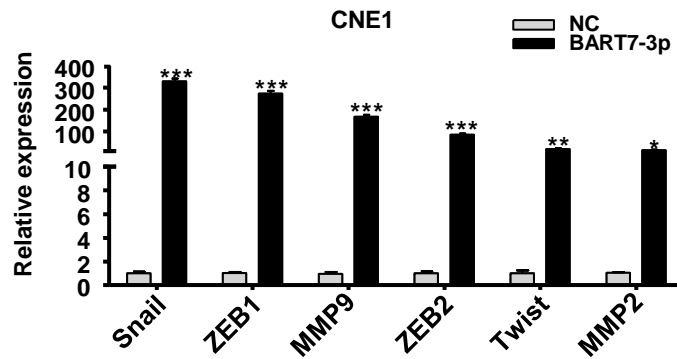

**a**

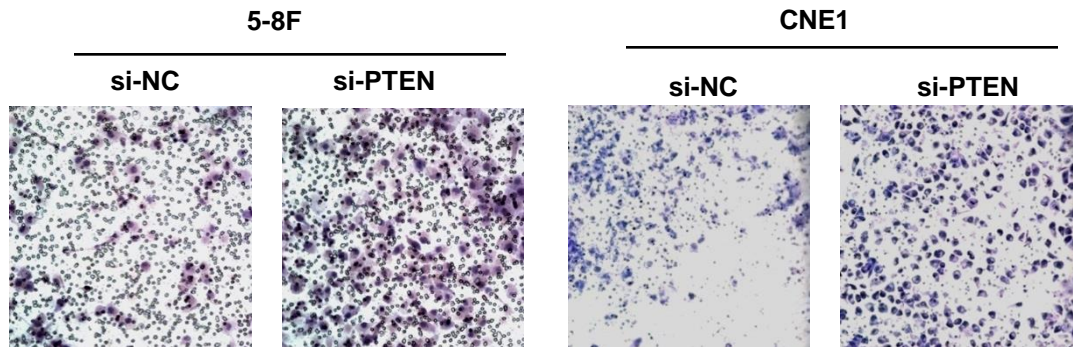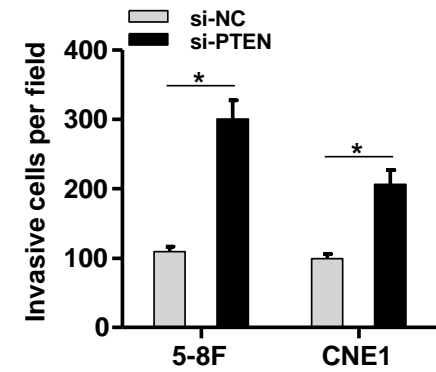

**b**

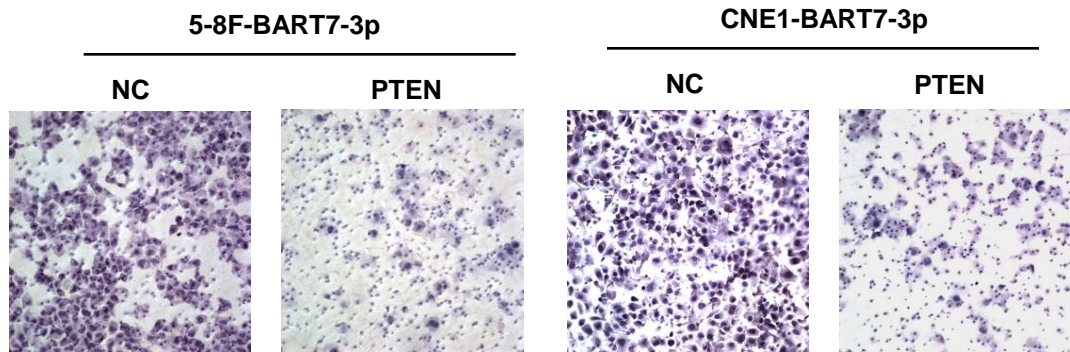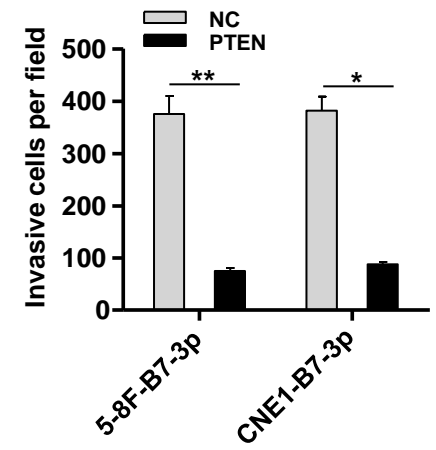

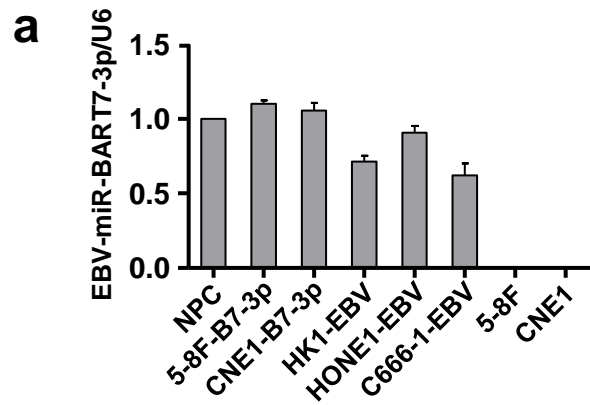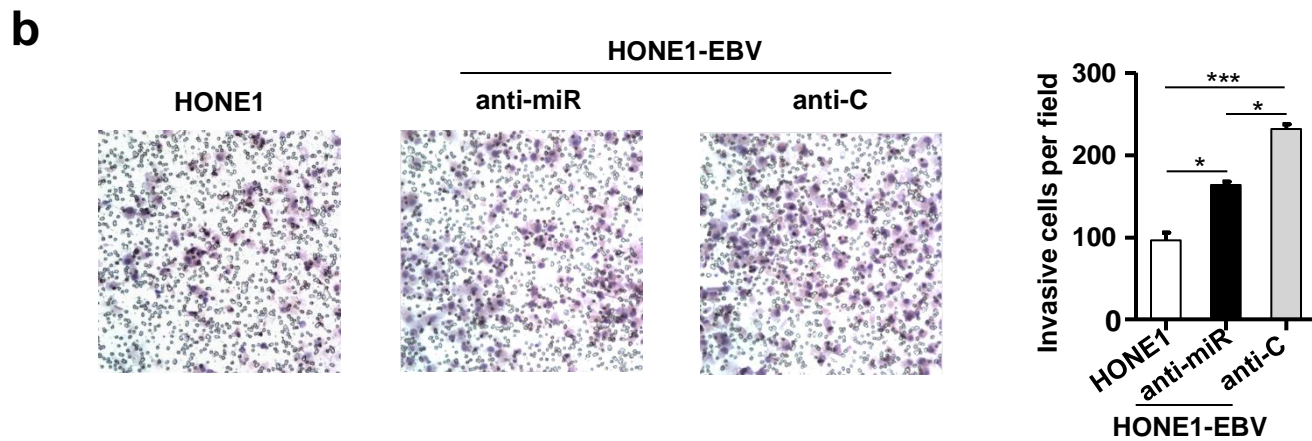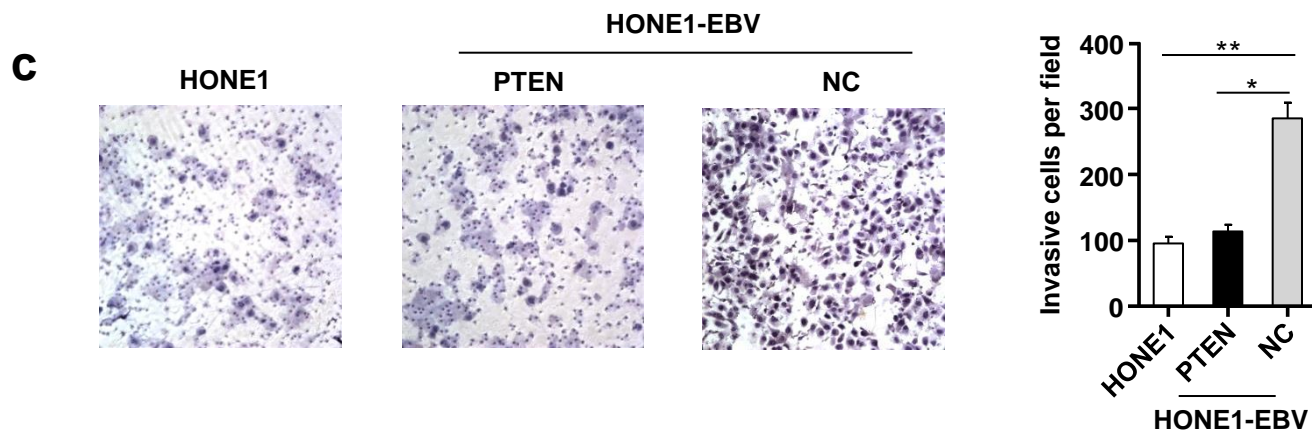

Supplement: 41388_2015_BFonc2014341_MOESM48_ESM.pdf [file 41388_2015_BFonc2014341_MOESM48_ESM.pdf]
